# Supplementary material for: Implication of TIGIT+ human memory B cells in immune regulation
Source: PubMed Central journal article supplement (PMC7943800; doi:10.1038/s41467-021-21413-y), 2021-03-09
Supplement: 41467_2021_21413_MOESM1_ESM.pdf [file 41467_2021_21413_MOESM1_ESM.pdf]

## **SUPPLEMENTARY INFORMATION**

### **Implication of TIGIT+ human memory B cells in immune regulation**

Md Mahmudul Hasan<sup>1</sup>, Sumi Sukumaran Nair<sup>2</sup>, Jacqueline G O'Leary<sup>3</sup>, Luan Snipes-Thompson<sup>3</sup>, Verah Nyarige<sup>4</sup>, Junwen Wang<sup>4</sup>, Walter Park<sup>5</sup>, Mark Stegall<sup>5</sup>, Raymond Heilman<sup>2</sup>, Goran B. Klintmalm<sup>3</sup>, HyeMee Joo<sup>1\*</sup> and SangKon Oh<sup>1\*</sup>

<sup>1</sup>Department of Immunology, Mayo Clinic, Scottsdale, AZ 85259, USA.

<sup>2</sup>Department of Medicine, Mayo Clinic, Phoenix, AZ 85054, USA

<sup>3</sup>Baylor University Medical Center, Dallas, TX 75246, USA.

<sup>4</sup>Department of Health Sciences Research, Mayo Clinic, Scottsdale, AZ 85259, USA.

<sup>5</sup>William J. von Liebig Transplant Center, Mayo Clinic, Rochester, MN 55905, USA

This file contains:

Supplementary Figs. 1-16

Supplementary Tables 1-3

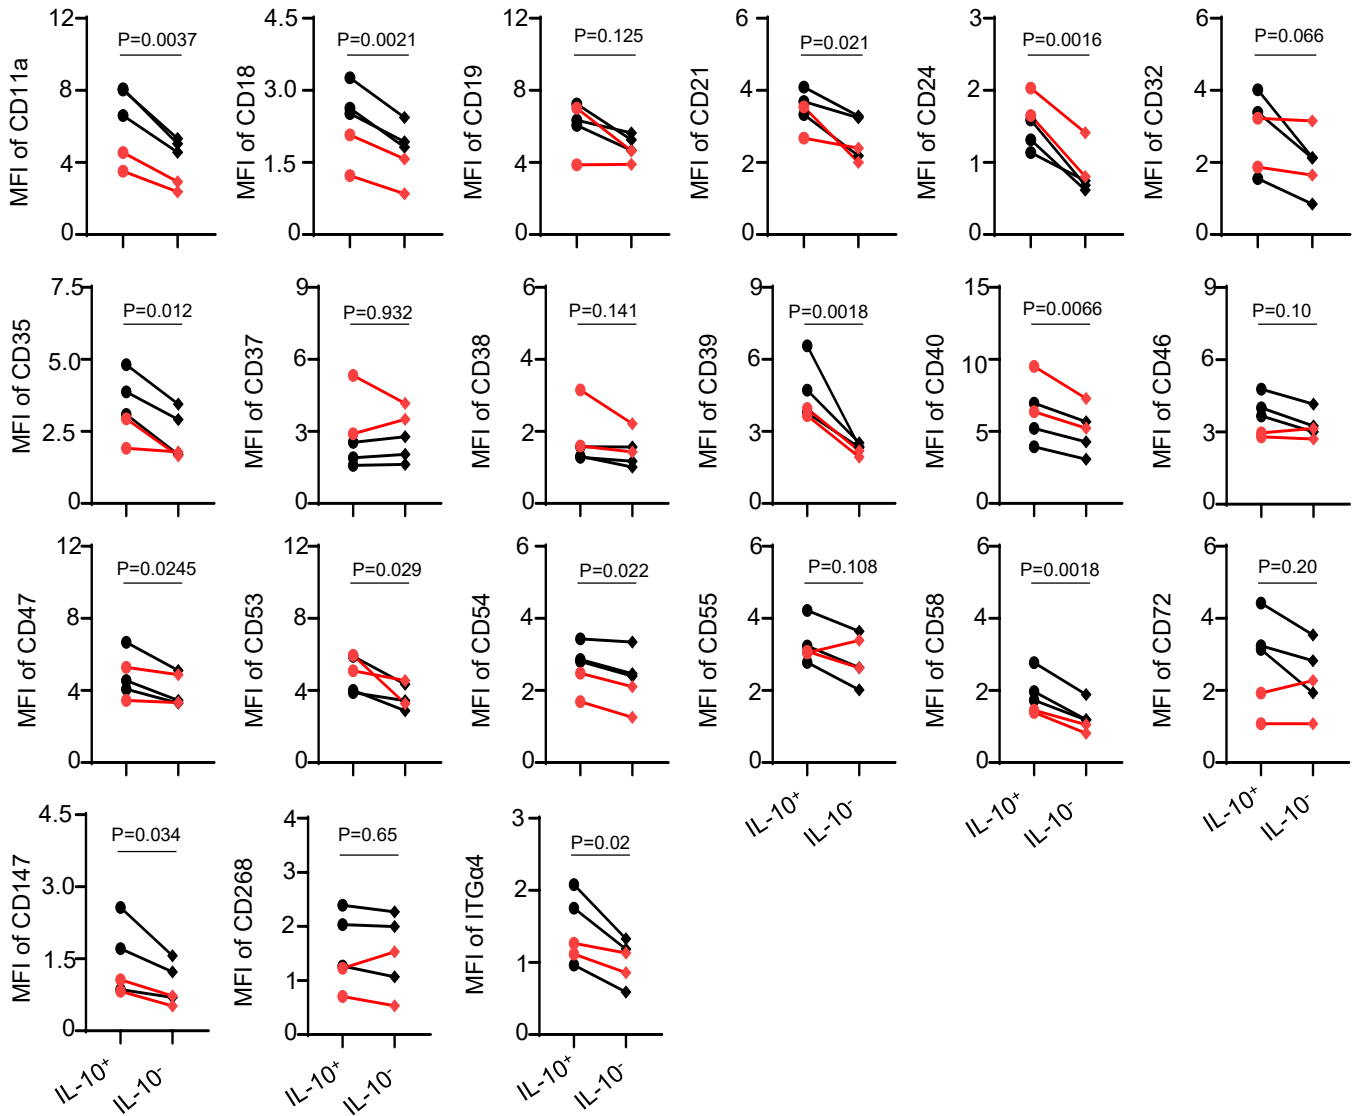

**Supplementary Fig. 1 Surface phenotypes of IL-10<sup>+</sup> and IL-10<sup>-</sup> B cells.**

B cells from the blood of healthy subjects (red) and tonsillar B cells (black) were stimulated as in Fig. 1. Delta MFI values ( $1 \times 10^3$ ) of CD11a, CD18, CD19, CD21, CD24, CD32, CD35, CD37, CD38, CD39, CD40, CD46, CD47, CD53, CD54, CD55, CD58, CD72, CD147, CD268, and integrin  $\alpha 4$  on both IL-10<sup>+</sup> and IL-10<sup>-</sup> B cells are presented. Each dot represents data generated with cells from different donors (n=5). Statistical significance was tested by a two-tailed paired *t*-test.

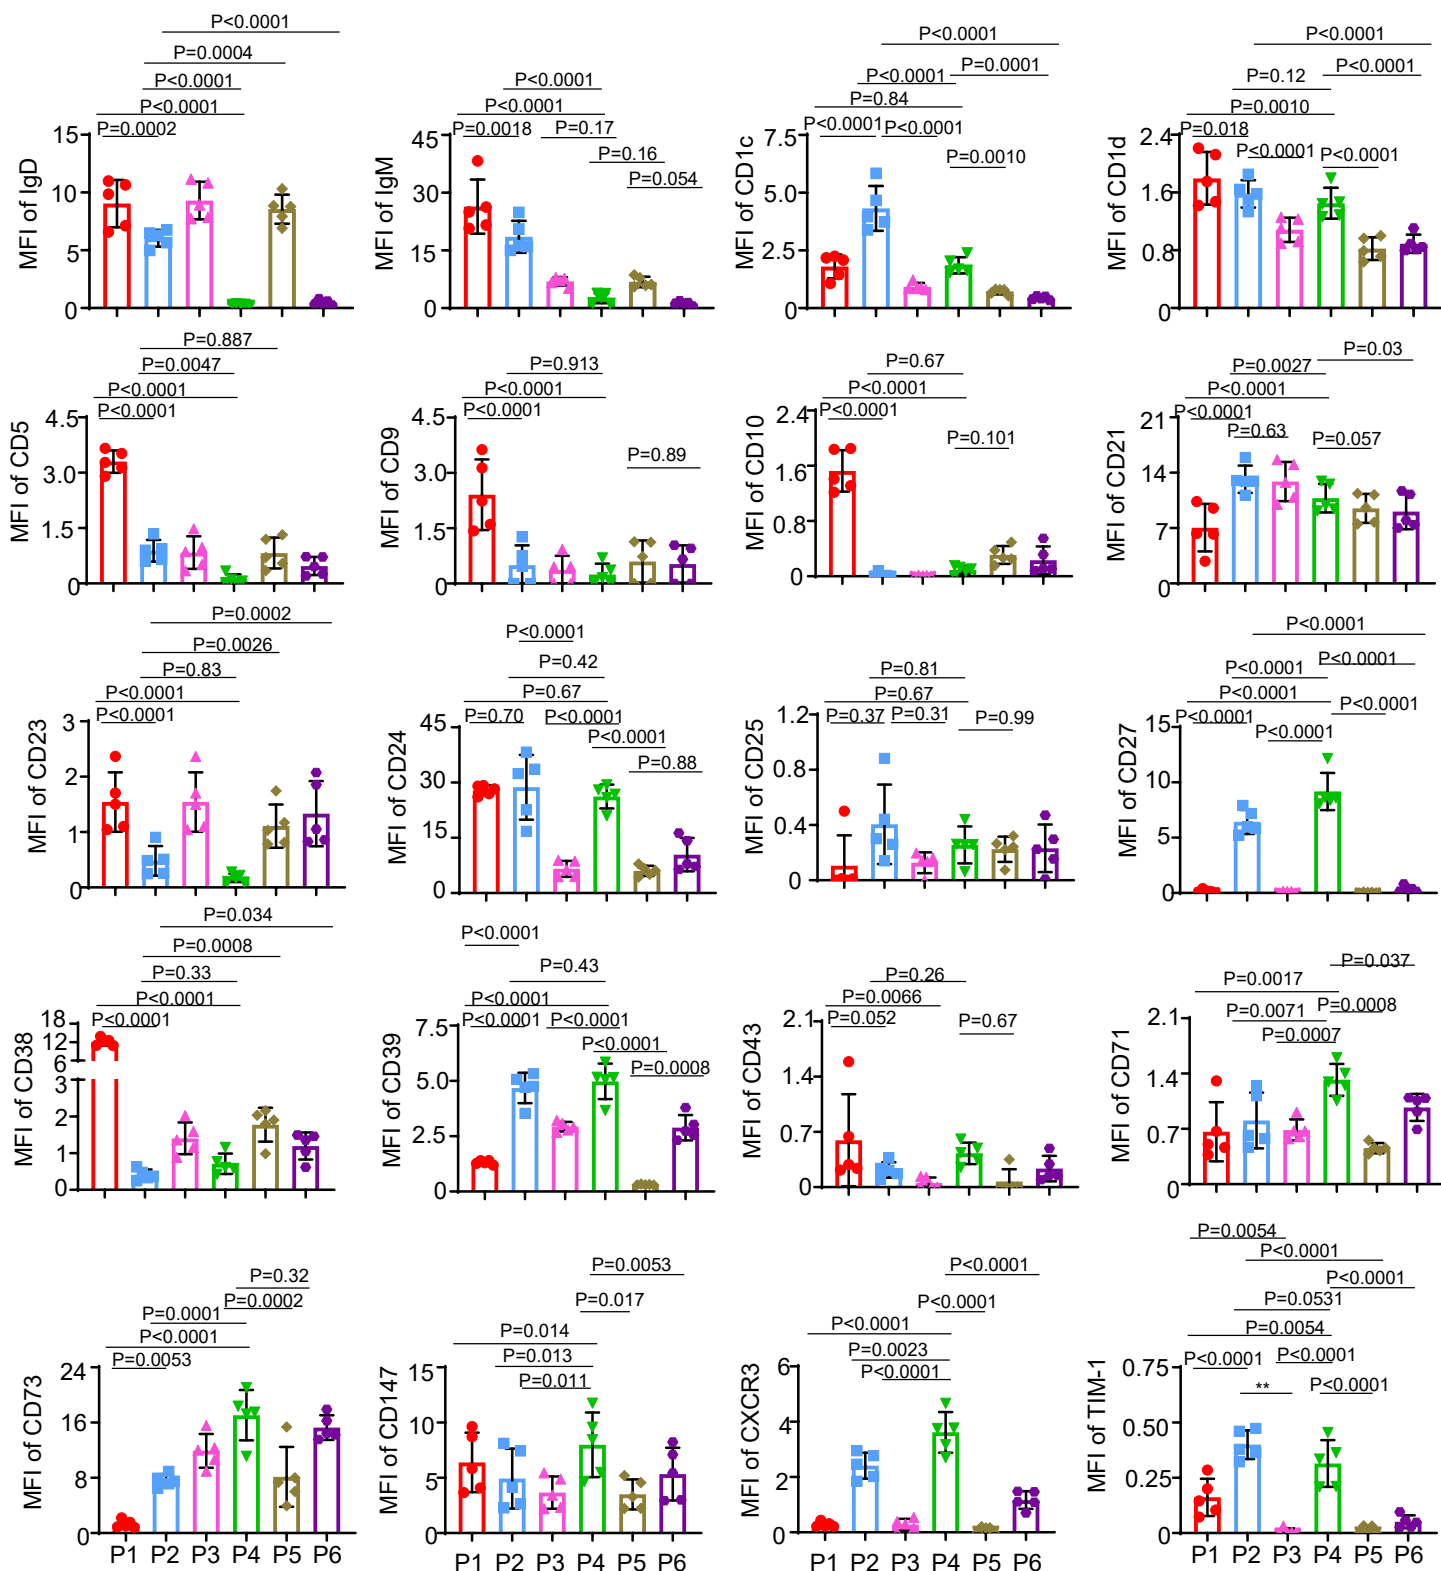

**Supplementary Fig. 2** Summary of MFI ( $1 \times 10^3$ ) values of cell surface molecules tested in Fig. 2c. Individual dots represent data generated with cells from different donors ( $n=5$ ). Error bars are mean  $\pm$  SD. One-way ANOVA with Holm-Sidak's multiple comparisons test was used.

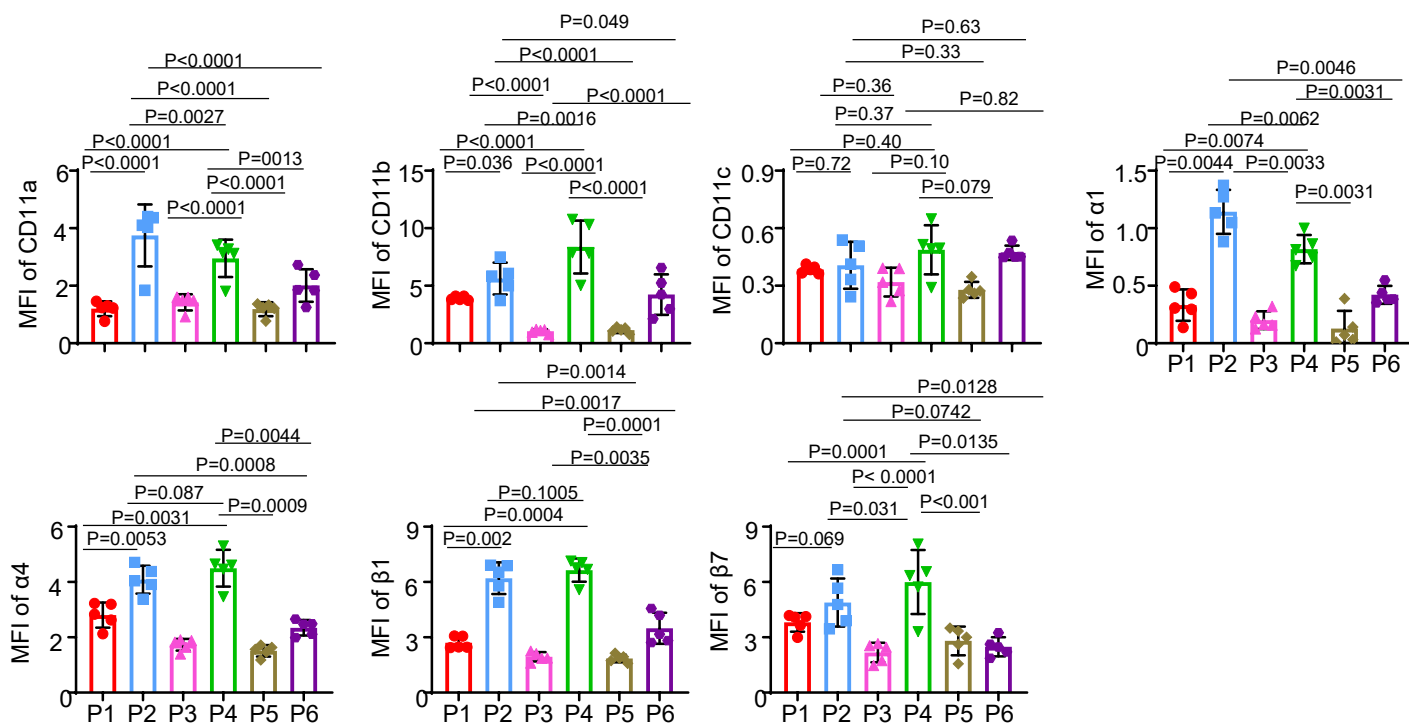

**Supplementary Fig. 3 Summary of MFI (1x10<sup>3</sup>) values of cell integrins tested in Fig. 2c.** Individual dots represent data generated with cells from different donors (n=5). Error bars are mean ± SD. One-way ANOVA with Holm-Sidak's multiple comparisons test was used.

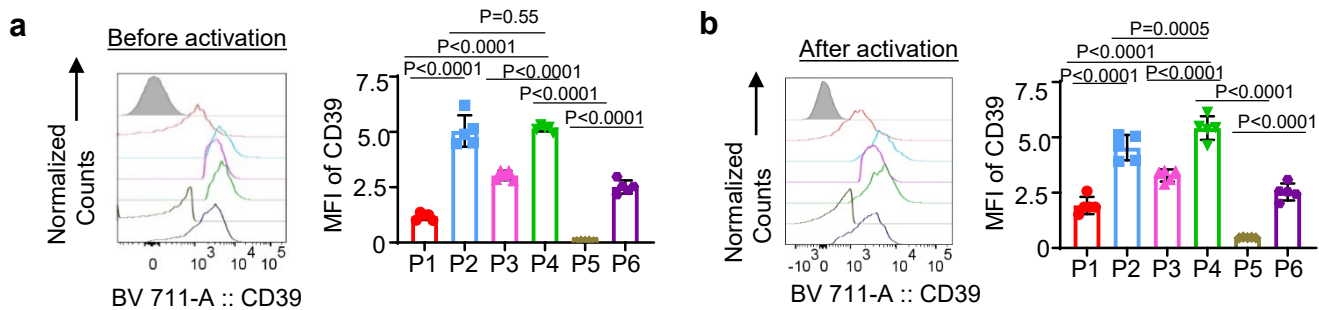

**Supplementary Fig. 4 CD39 expression on P1-P6 B cells before and after activation with CpG-B.**

(a-b) FACS plot and bar graphs showing MFI values ( $1 \times 10^3$ ) of CD39 on P1-P6 B cell subsets before (a) and after 16 hrs CpG-B activation (b). Individual dots in **a** and **b** represent data generated with cells from different donors ( $n=5$ ). Error bars are mean  $\pm$  SD. P values were acquired with one-way ANOVA with Holm-Sidak's multiple comparisons test.

**a**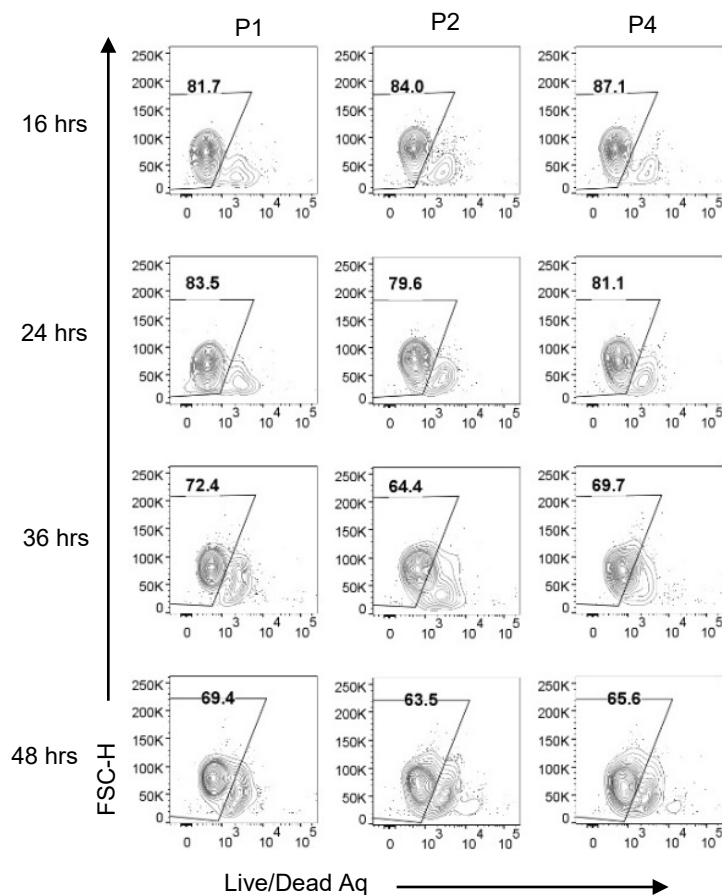**b**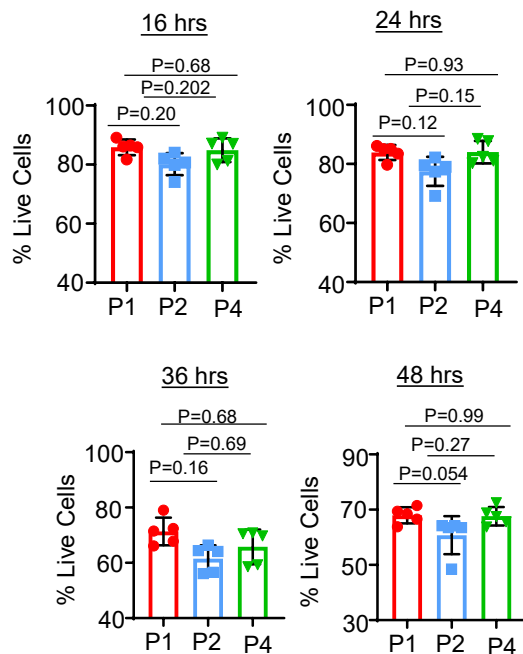

**Supplementary Fig. 5 P1, P2, and P4 B cells maintain similar cell viability during *in vitro* culture.** FACS-sorted P1, P2, and P4 B cells were cultured in the presence of CpG-B for 48 hrs. The frequency of live and dead cells were assessed using Live/Dead Fixable Aqua Dead Cell Stain Kit. (a) Representative FACS data are presented. (b) Summarized data generated with cells from the blood of different healthy subjects (n=5) in three independent experiments. Error bars are mean  $\pm$  SD. P values were acquired with one-way ANOVA with Holm-Sidak's multiple comparisons test.

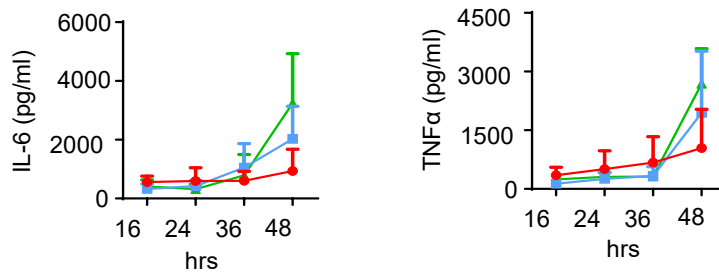

**Supplementary Fig. 6 P1, P2, and P4 B cells can express both IL-6 and TNF $\alpha$  in response to CpG-B stimulation.** FACS-sorted P1, P2, and P4 B cells were cultured in the presence of CpG-B for 48 hrs as in Fig.3d. Culture supernatants were collected at indicated time points. The amount of IL-6 and TNF $\alpha$  in the supernatants were assessed with bead-based multiplex assays. Summarized data of from three independent experiments using cells from healthy subjects (n=4). Error bars are mean  $\pm$  SD.

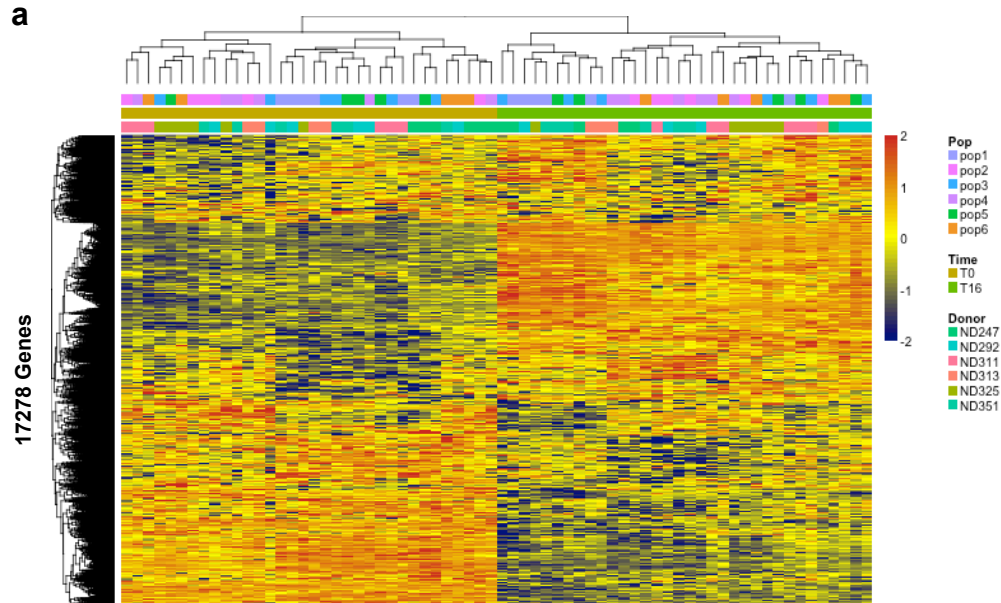

**b**

| Comparison      | FDR<br>$p < 0.05$ |     | FDR<br>$p < 0.01$ |     |
|-----------------|-------------------|-----|-------------------|-----|
|                 | T0                |     | T16               |     |
| Pop2 vs. Pop1   | 659               | 635 | 573               | 535 |
| Pop2 vs. Pop4   | 116               | 91  | 80                | 57  |
| Pop4 vs. Pop1   | 720               | 695 | 818               | 789 |
| Pop2 vs. Pop356 | 297               | 274 | 241               | 213 |
| Pop4 vs. Pop356 | 235               | 176 | 473               | 456 |
| Pop1 vs. Pop356 | 413               | 386 | 220               | 191 |

**Supplementary Fig. 7 Transcriptome analysis of FACS-sorted blood circulating B cell subsets (P1-P6).** (a) Heatmap showing expression of all genes (17278) for individual donors before and after activation with CpG B. (b) Numbers of significantly expressed genes with FDR value  $P < 0.05$  among different B cell subsets. . One-way Welch analysis of variance (ANOVA) was conducted using a P-value cutoff of 0.05 and Benjamini-Hochberg multiple testing correction.



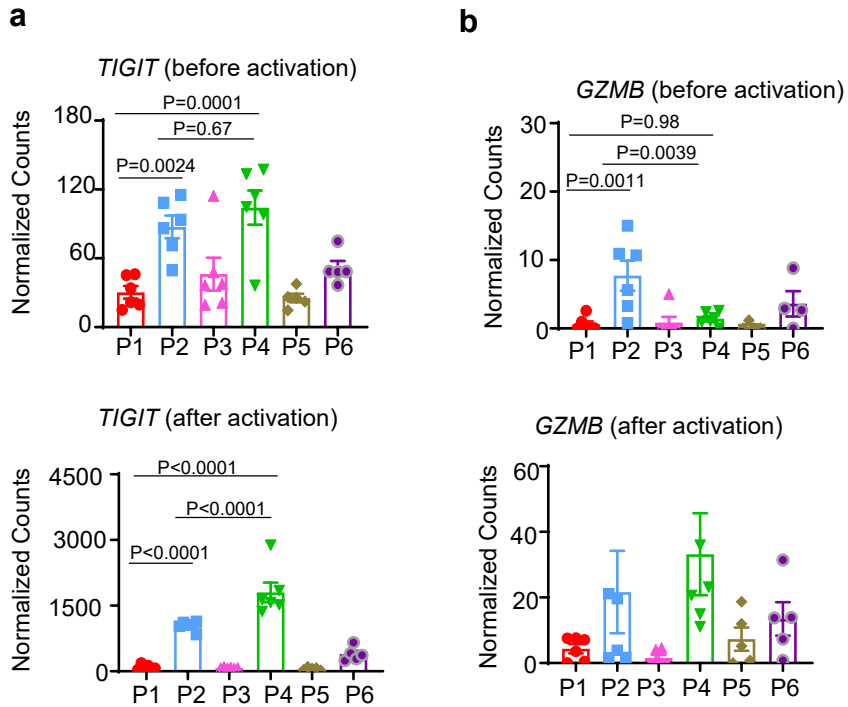

**Supplementary Fig. 8** Normalized counts of *TIGIT* (a) and *GZMB* (b) expression before and after activation with CpG-B for 16 hrs. Error bars are mean  $\pm$  SD. Data from six independent experiments performed with cells from healthy subjects (n=6). Statistical significance was tested with one way ANOVA with Holm-Sidak's multiple comparisons test.

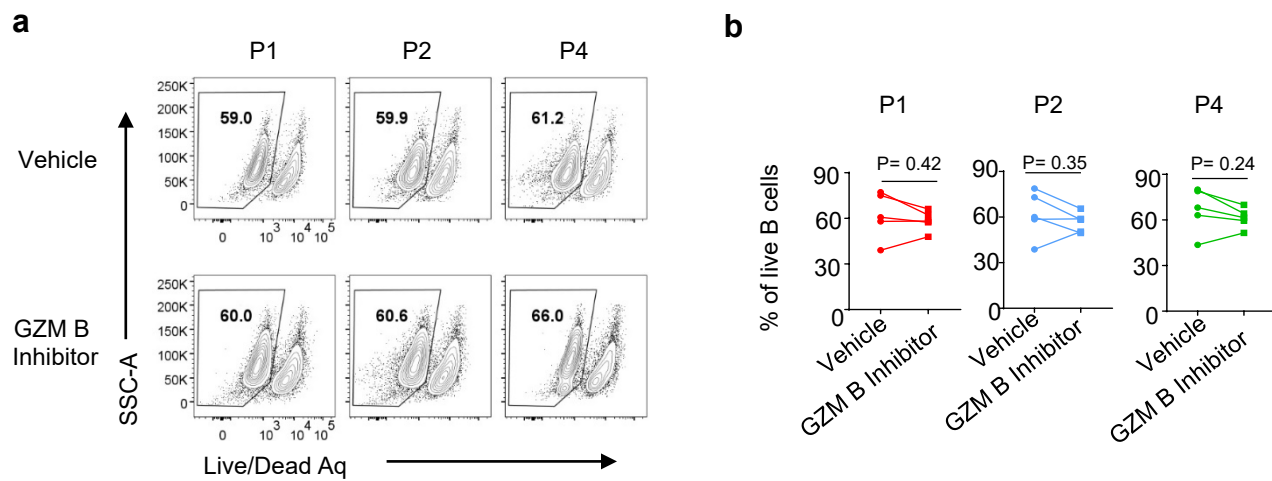

**Supplementary Fig. 9 Granzyme B inhibitor does not alter B cell viability.** B cells in Fig. 4f were stained with Live/Dead Fixable Aqua Dead Cell Stain Kit (a). Summarized data generated with cells from healthy subjects (n=5) in three independent experiments (b). Statistical significance was tested with a two-tailed paired *t*-test.

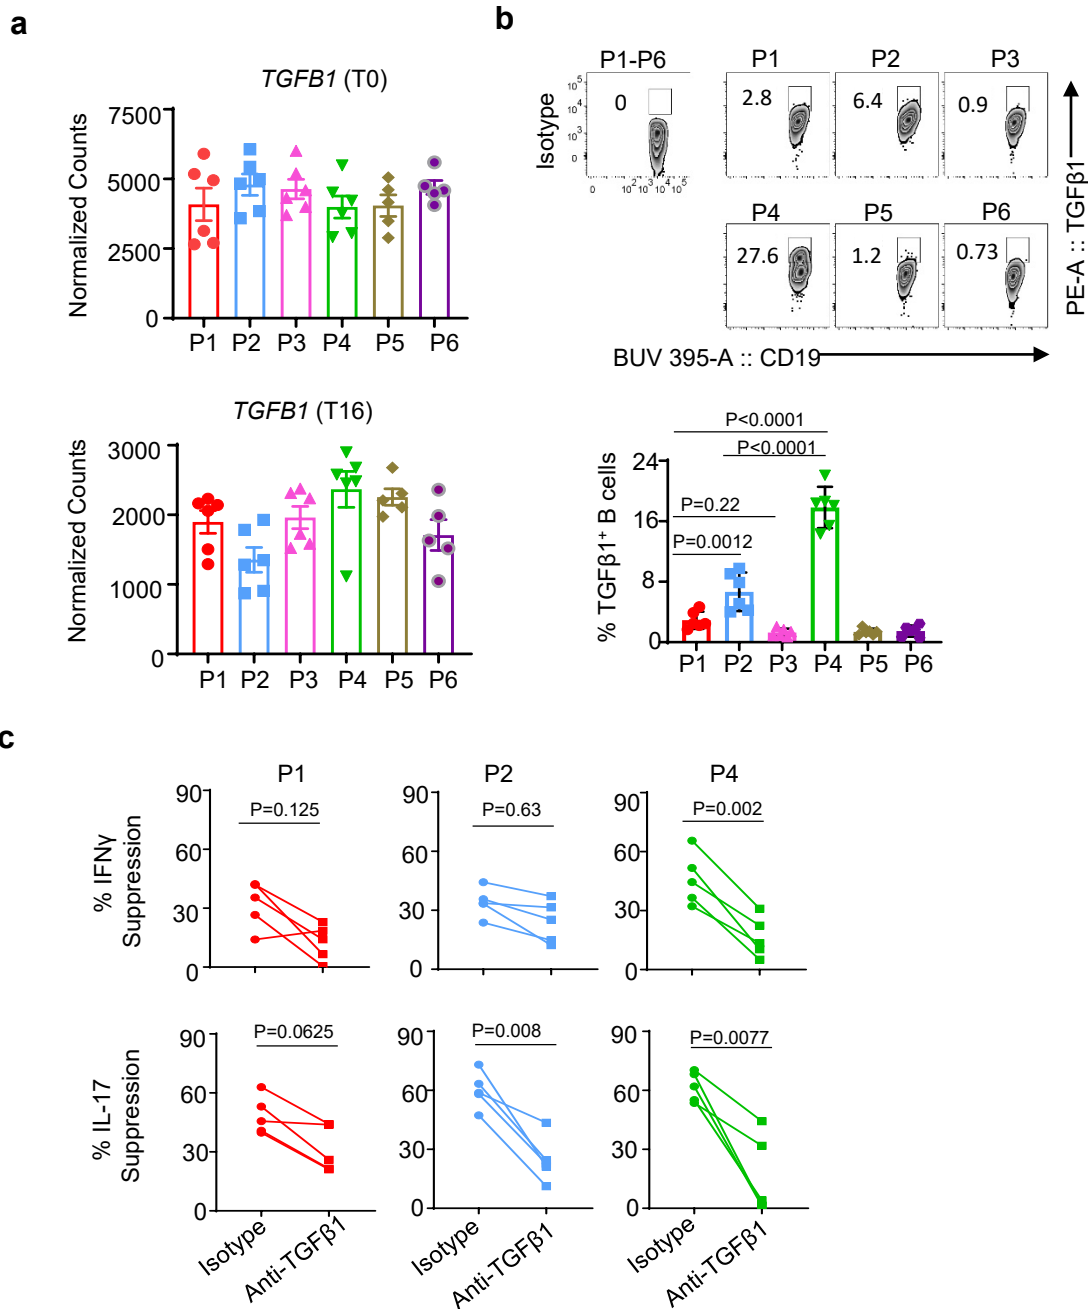

**Supplementary Fig. 10 TGF $\beta$ 1 expressed by P4 memory B cell can suppress IFN $\gamma$  and IL-17 expression by CD4 $^+$  T cells . (a) Normalized counts of *TGF $\beta$ 1* before activation (upper panel) and after activation for 16 hrs with CpG-B (lower panel). RNA-Seq analysis for all six populations (P1-P6) purified from the blood of healthy individuals (n=6) was performed at once. (b) Representative FACS plots and summarized data showing TGF $\beta$ 1 expression on P1-P6 B cell subsets upon 48 hrs CpG-B stimulation. Cells were further stimulated for 5 hrs with PMA/ionomycin in the presence of monensin and brefeldin A before staining them with anti-CD19 followed by intracellular TGF $\beta$ 1 staining. Data were obtained from three independent experiments using cells from healthy donors (n=6). Error bars represent means  $\pm$  SD. Statistical significance was tested with One-Way ANOVA with Holm-Sidak's multiple comparisons test . (c) Summarized data showing that blocking TGF $\beta$ 1 with anti-TGF  $\beta$ 1 antibody results in the recovery of both IFN $\gamma$  and IL-17 expression by CD4 $^+$  T cells. FACS-sorted P1, P2, and P4 B cells were stimulated for 48 hrs with CpG-B, pre-incubated with anti-TGF $\beta$ 1 or isotypes and then co-cultured for 4 days with autologous CD4 $^+$  T cells stimulated with anti-CD3/anti-CD28 beads. PMA, ionomycin, brefeldin A, and monensin cocktails were added 5 hrs before intracellular cytokine staining. Data from three independent experiments performed with cells from healthy individuals (n=5). Error bars are mean  $\pm$  SD. Statistical significance was tested with a two-tailed paired *t*-test.**

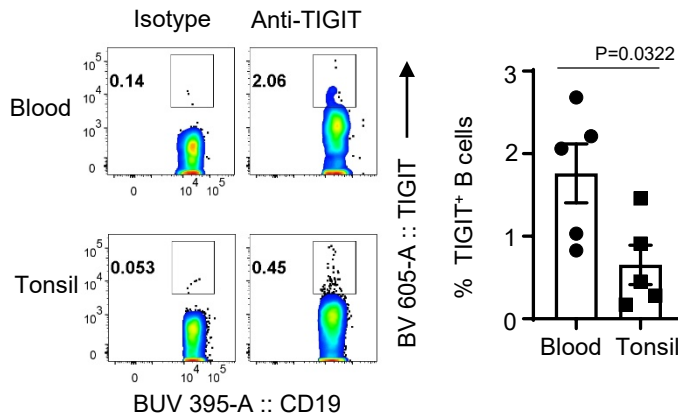

**Supplementary Fig. 11 TIGIT expression on total CD19<sup>+</sup> B cells from the blood and tonsils.**

Frequency of TIGIT<sup>+</sup> B cells in the blood and tonsil was assessed. Individual dots represent data generated with cells from different donors (n=5) in three independent experiments. Error bars indicate mean ± SD. Statistical significance was tested with a two-tailed *t*-test.

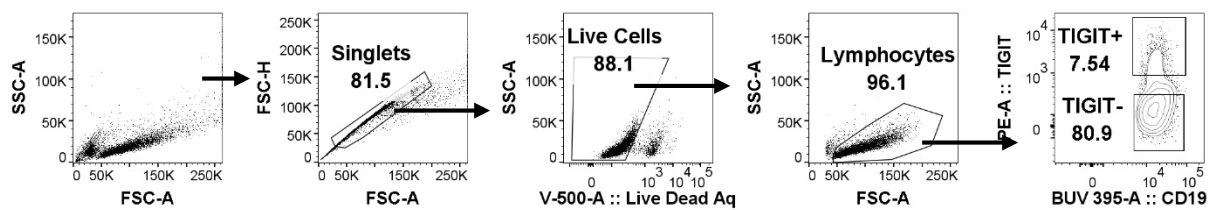

**Supplementary Fig. 12. Gating strategies for TIGIT<sup>+</sup> memory and TIGIT<sup>-</sup> B cell sorting.** Purified CD19<sup>+</sup> memory B cells were stimulated with CpG-B for 48 hours. Cells were labeled with Live/Dead Aqua, anti-CD19, and anti-TIGIT prior sorting.

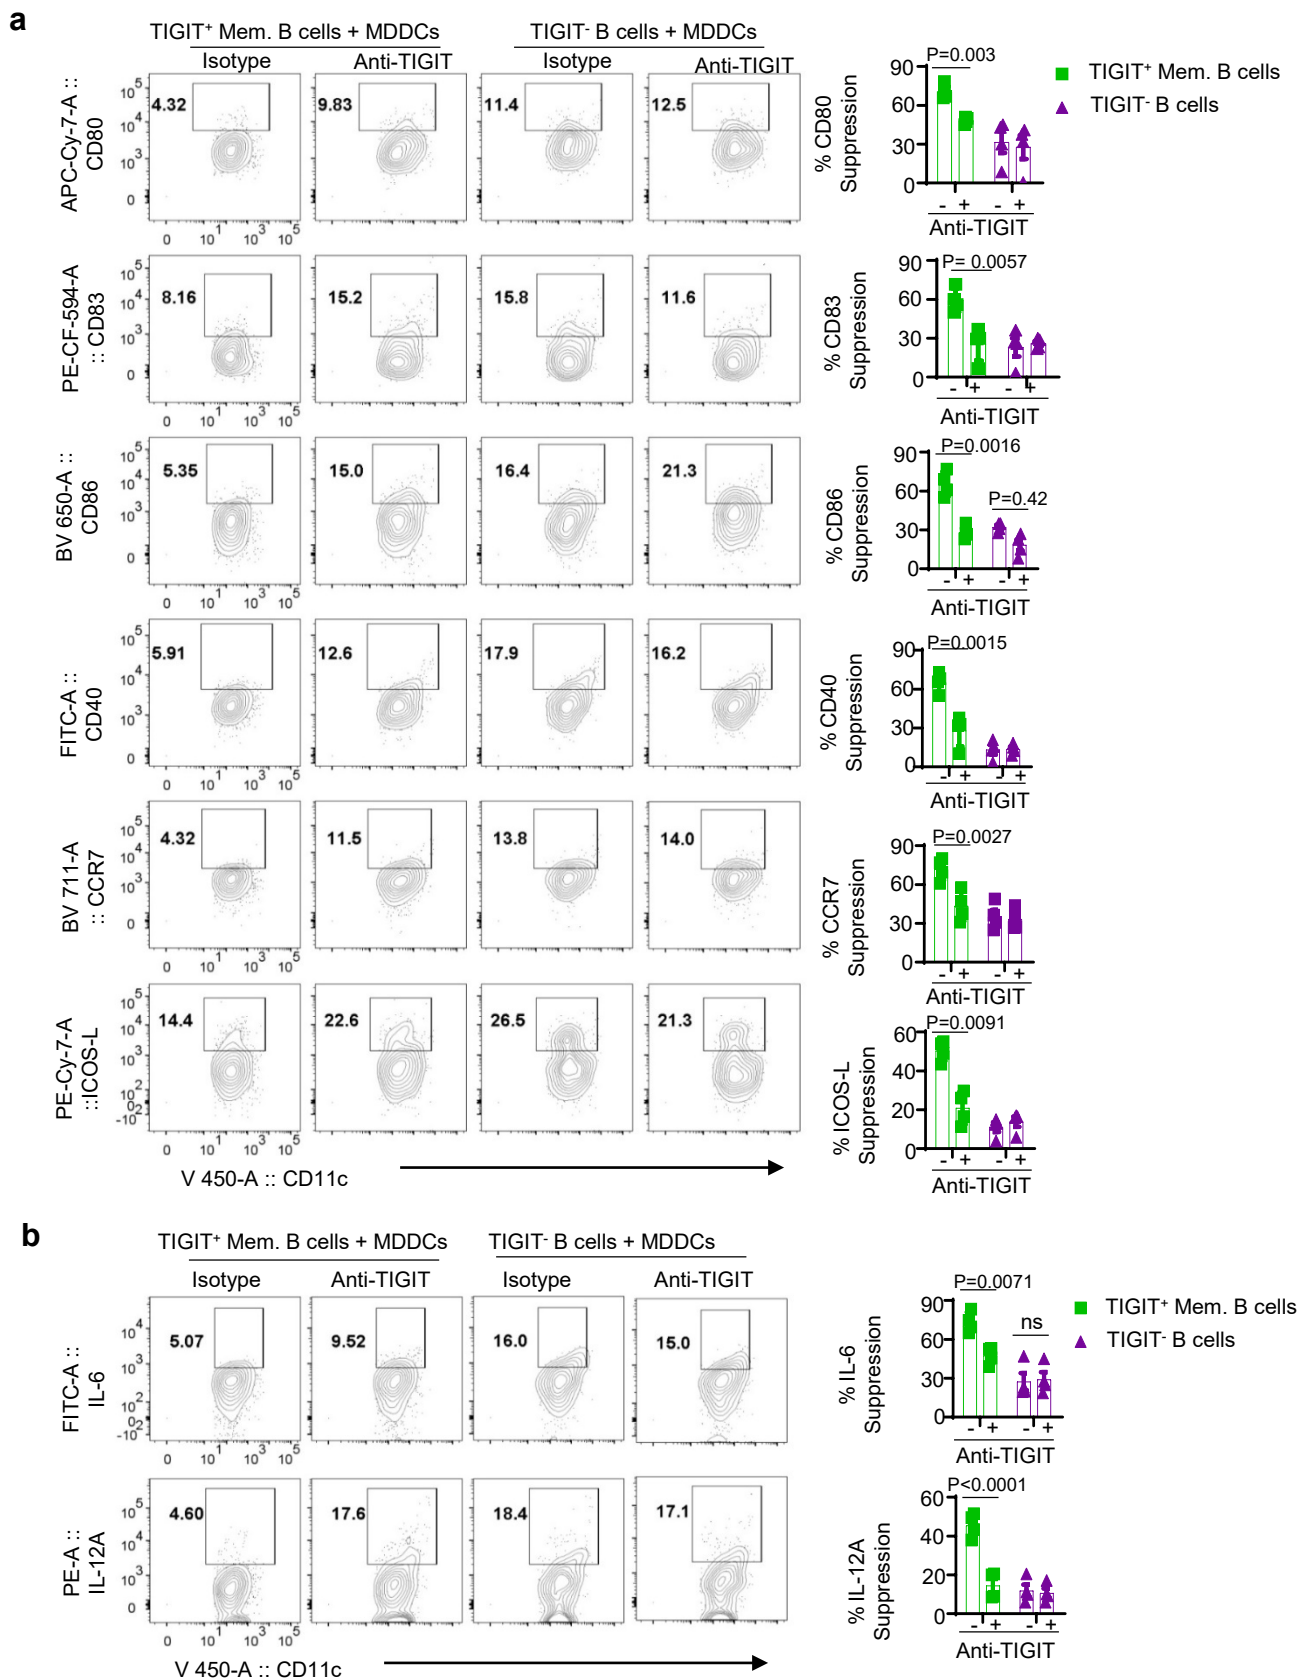

**Supplementary Fig. 13 TIGIT expressed by memory B cells suppress DC maturation and proinflammatory cytokine expression**. Representative FACS plots and summarized data showing the suppression of maturation markers (a) and proinflammatory cytokines (b) expression by DCs. LPS-stimulated MDDCs were cultured with or without TIGIT<sup>+</sup> B cells or TIGIT<sup>-</sup> B cells in the presence or absence of anti-TIGIT antibody. Fig. a and b, data were obtained from four independent experiments using cells from healthy donors (n=4). Error bars are mean  $\pm$  SD. Statistical significance was tested by two-way ANOVA with Sidak's multiple comparisons test.

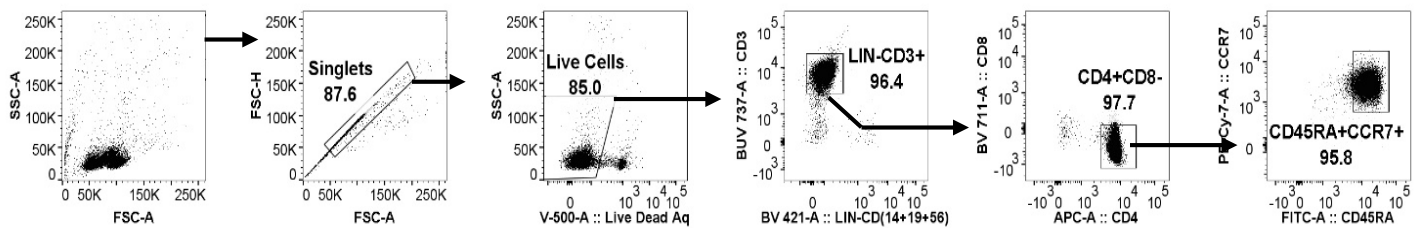

**Supplementary Fig. 14. Gating strategies for naïve CD4<sup>+</sup> T cell sorting.** (a) Naïve CD4<sup>+</sup> T cells were enriched with an enrichment kit. Cells were labeled with Live/Dead Aqua, anti-CD3, anti-CD8, anti-CD4, anti-CCR7, anti-CD45RA, and anti-(CD14, CD19, CD56) cocktails prior to cell sorting.

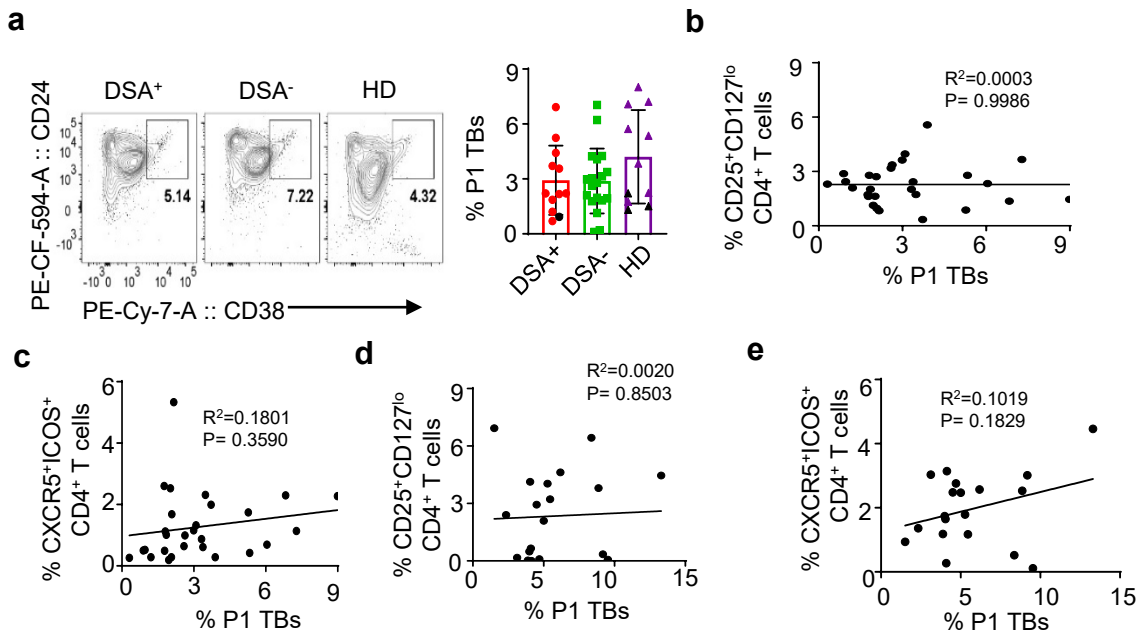

**Supplementary Fig. 15. P1 TBs in liver (a-c) and kidney allograft recipients (d-e) in Fig. 7.** (a) Representative FACS plots and summarized data for the frequency of CD24<sup>hi</sup>CD38<sup>hi</sup> P1 TBs in the blood of DSA<sup>+</sup> (n=12) and DSA<sup>-</sup> (n=19) liver allograft recipients and healthy subjects (n=9). Dots represent individual patients. Bars indicate mean  $\pm$  SD. (b) Correlation between the frequency of P1 TBs and that of Tregs in the blood of liver transplant patients. (c) Correlation between the frequency of P1 TBs and that of TFH cells in the blood of liver transplant patients. (d) Correlation between the frequency of P1 TBs and that of Tregs in the blood of renal allograft recipients. (e) Correlation between the frequency of P1 TBs and that of Tregs in the blood of renal allograft recipients. Individual dots represent data generated with cells from different donors. Pearson's correlation test was used.



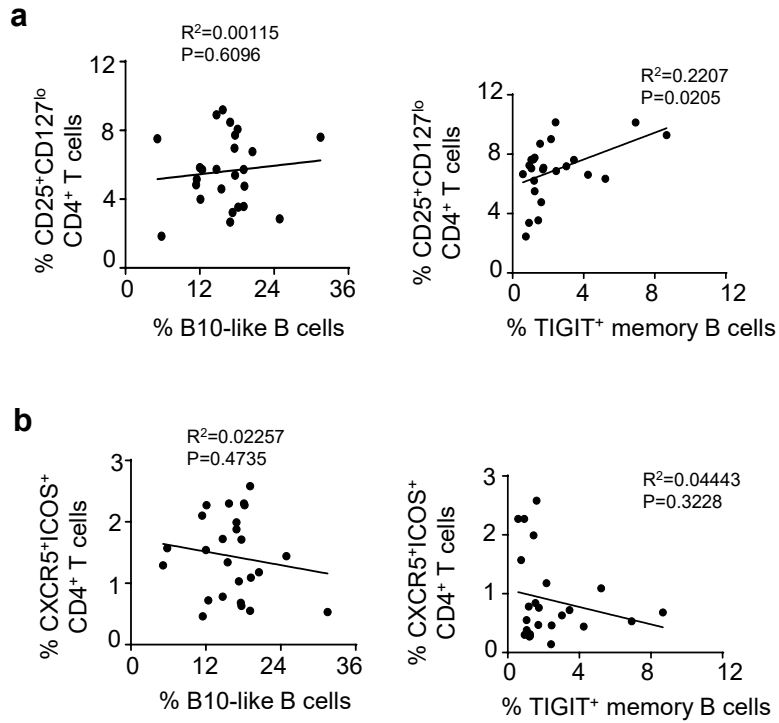

**Supplementary Fig. 16. Analysis of the frequency of B cell subsets, CD25<sup>+</sup>CD127<sup>lo</sup> CD4<sup>+</sup> T cells, and CXCR5<sup>+</sup>ICOS<sup>+</sup> CD4<sup>+</sup> T cells in the blood of healthy subjects.** (a) Correlation between the frequency of CD25<sup>+</sup>CD127<sup>lo</sup> CD4<sup>+</sup> T cells and B cell subsets (n=17). (b) Correlation between the frequency of CXCR5<sup>+</sup>ICOS<sup>+</sup> CD4<sup>+</sup> T cells and B cell subsets (n=17). Individual dots represent data generated with cells from different donors. Pearson's correlation test was used.

**Supplementary Table 1: List of genes related to cell surface markers**

|          |          |         |           |           |                 |
|----------|----------|---------|-----------|-----------|-----------------|
| PAM      | P2RX4    | EVA1C   | CD19      | PCDHGA11  | CD300A          |
| NTRK2    | VSIG1    | TRPV2   | TTYH3     | MFSD6     | CD46            |
| CD72     | PCDHGA10 | CD44    | TNFRSF25  | DEF6      | GRIK4           |
| LRP11    | KISS1R   | GPR25   | ATRAID    | FLT1      | ROBO1           |
| IL21R    | PMEPA1   | ATRNL1  | CD53      | SLC26A6   | TPCN1           |
| PCDH9    | PCDHGB4  | TMX4    | CLDND1    | GPER1     | NTNG2           |
| HFE      | CCR10    | DCBLD1  | SLC16A1   | F3        | EMB             |
| MUC16    | PCDHGA8  | MCAM    | ITGAM     | ITGAL     | ERMP1           |
| NCR3LG1  | GPR18    | IL12RB1 | GPC2      | SLC1A1    | ZDHHC5          |
| SLC37A4  | TSPAN2   | MFSD5   | RIF1      | ITGAV     | CD59            |
| MMP17    | IL15RA   | CD58    | RRP1      | CD1A      | LPAR2           |
| ADAM22   | CR1      | HCRTR1  | EPHA4     | VSIG10L   | TMED7           |
| PCDHGB2  | SYPL1    | ENG     | LRP8      | TNFSF13B  | SLC6A3          |
| PTAFR    | LTB4R2   | TMEM87B | MANSC1    | HYAL2     | ENSG00000116957 |
| CHRNA6   | PCDHGA6  | TREML2  | OPN3      | TLR10     | ENTPD1          |
| GPRC5D   | ZP3      | PATJ    | GLRA3     | CD82      | CXCR3           |
| SDC1     | PCDHGA4  | GPR146  | SLC40A1   | SCN1B     | QSOX2           |
| SCN4A    | SLC15A4  | GPR34   | PECAM1    | EVI2A     | SLC44A1         |
| SLC19A1  | BTNL9    | ATP2B4  | CD86      | CHODL     | EMP1            |
| F2RL1    | ABCB9    | CCR1    | NCR3      | PCDHGA5   | ASTN2           |
| LAIR1    | CSF2RB   | SLC52A2 | SGCE      | FCRL5     | NCAM2           |
| KIAA1324 | PCDHGB7  | TMEM25  | CD226     | SLC1A2    | CUZD1           |
| CYSLTR1  | CRB3     | CLEC17A | SLC7A1    | LIG3      | FLVCR1          |
| APLP2    | EPHB1    | ITGA3   | ECE1      | ABCG2     | GUCY2C          |
| ILDR1    | GGT1     | SLCO3A1 | PLXNB1    | CD80      | BTN3A1          |
| MBP      | IL6R     | TMEM67  | MET       | GPR55     | TMEM150A        |
| SIGIRR   | F2RL3    | RET     | RNF149    | LRIG1     | PLD5            |
| IL5RA    | ABCB4    | TMEM219 | TBXA2R    | GJA3      | NTNG1           |
| ESAM     | FOLR2    | SLC4A8  | IL18R1    | TMEM87A   | ABCC4           |
| ANTXR2   | BTN1A1   | BTN3A3  | CD27      | SLC17A9   | PLXND1          |
| CPD      | SSPN     | CD200   | PTPRK     | KLRG1     | APP             |
| KIAA0319 | ENPP1    | TLR6    | SLC2A9    | GINM1     | WDR11           |
| TNFRSF19 | TNFRSF17 | FAS     | TAS1R3    | EBP       | SLC33A1         |
| PSEN2    | RHBDF2   | IGHEP1  | ABCA1     | HLA.A     | SLC2A1          |
| TMEM154  | ACVR1    | TSHR    | PTGIR     | TNFRSF10A | SLC38A5         |
| PCDHGB5  | ENPP5    | SLC23A2 | C11orf24  | SLC43A1   | HTR1F           |
| OR2C1    | GDPD5    | SLC10A3 | TGOLN2    | GPR68     | ALCAM           |
| NRN1     | JAM2     | PIGT    | HM13      | IL4R      | SPRN            |
| PCDHGB3  | SHISA8   | GPR108  | MFSD2A    | SLC7A6    | CEACAM21        |
| CLEC2D   | EVI2B    | TPRA1   | SLC9A7    | BMPR1A    | NAGPA           |
| ATP1B1   | PTPRB    | MPZL3   | LILRA1    | SGCB      | SLC39A8         |
| CNNM4    | ITGB1    | TSPAN5  | PARM1     | SLC4A7    | DPEP3           |
| CD5      | BRAP     | GPC4    | TNFRSF13B | RPN1      | SERINC3         |
| TIGIT    | CHRNA1   | DCHS1   | IL27RA    | IFNLR1    | SLC39A6         |
| PCDHGA7  | P2RX1    | GGT7    | HLA.E     | PTGER4    | ANO9            |
| SLC6A6   | BTF3     | PTPRG   | EVC2      | SERINC2   | SPN             |
| GPR15    | IGF2R    | IGSF3   | IL2RA     | DLL1      | APCDD1          |
| PRRT3    | TCTN3    | SLC38A1 | FURIN     | CNNM3     | PCDHGA12        |
| SLC22A7  | SLC17A5  | FGFRL1  | PCDHGB6   | GPR82     | LTB4R           |
| ADAM19   | LRRC32   | HAVCR2  | MST1R     | SLC46A1   | GPR150          |

|          |          |           |           |          |          |
|----------|----------|-----------|-----------|----------|----------|
| NUP210   | NETO2    | PDGFRB    | SCARB1    | CYBB     | LRRC25   |
| MFSD11   | ABCC1    | SLC3A2    | PLXNA3    | CD22     | S1PR2    |
| ADAM8    | CHRNA5   | C14orf132 | ITGB4     | RNF130   | DCBLD2   |
| SLC30A1  | TM9SF2   | M6PR      | HEG1      | TXNDC15  | CCR9     |
| SLC5A9   | LMAN2    | P2RY14    | SLC2A6    | TMEM62   | EPOR     |
| MFSD12   | MCUB     | ATP13A1   | P2RY10    | IL13RA1  | PLXDC2   |
| TM9SF4   | CELSR3   | NEO1      | ITGB8     | MPEG1    | MYOF     |
| SUSD3    | LTK      | PCDHGC3   | CDH24     | AREG     | CD9      |
| ADCY9    | GPR174   | FLT3      | GPA33     | TMEM104  | TREM1    |
| SEMA4D   | SLC22A15 | SLC22A4   | SLC7A5    | CHRNA10  | SLC16A7  |
| PLXNA2   | CD69     | SLAMF7    | JAM3      | PKHD1L1  | ABCA3    |
| SLC41A2  | BSG      | FCRL3     | QSOX1     | CDHR3    | FAM171A2 |
| SLC12A3  | ITGA5    | SEMA4C    | C3orf35   | ENPP4    | PLXNC1   |
| C19orf38 | GPR132   | ST7       | TNFRSF10D | PIEZO1   | VSIG10   |
| ITGB7    | SLC51A   | LRRN1     | TNFSF4    | SDK2     | FAM174A  |
| SEMA4F   | DCHS2    | TMEM9B    | FZD7      | BTN3A2   | SLC38A9  |
| CD70     | CRIM1    | SLC1A5    | ACVR2A    | SLC23A1  | MFSD8    |
| NETO1    | ACVR2B   | SLC39A14  | TSPAN17   | CDHR1    | PRLR     |
| LYVE1    | CSF1     | ADORA2A   | TNFSF8    | LPAR5    | CD200R1  |
| IFNGR1   | TNFRSF8  | SLC16A5   | CD164     | ITGA7    | PLAUR    |
| ATP1B3   | TMEM132A | TNFRSF1A  | TTYH2     | DDR2     | FRRS1    |
| HLA.C    | TMEM182  | ATP1A1    | ABCA6     | FCRL4    | BACE2    |
| ADAM23   | HLA.F    | SLC29A3   | ADAM17    | LRRC37A  | SLC2A11  |
| LMAN2L   | SDK1     | MCOLN1    | CACHD1    | SLC19A2  | SLC43A2  |
| TMPRSS15 | LBH      | S1PR5     | NIPAL3    | CLEC4G   | LPAR6    |
| SELP     | ATP13A2  | TMEM231   | CD24      | KCNMB4   | GRIN2C   |
| KEL      | TSPAN13  | S1PR4     | SLC29A1   | ITGAX    | CHRN1B   |
| LMBRD1   | SLC8B1   | PI16      | C19orf18  | SLC2A5   | SLC22A5  |
| SSR1     | GPR171   | CADM1     | STIM1     | BTN2A1   | CD63     |
| PODXL    | CD52     | CD151     | TMEM131L  | GPAT4    | LAMP3    |
| MICB     | TMEM63A  | SLC5A3    | CD79B     | JAML     | GPR152   |
| CALHM2   | SNRPD1   | EIF2A     | CEACAM1   | MS4A6A   | HLA.DPB1 |
| CD320    | TCIRG1   | HTR3A     | SLC9A1    | CELSR1   | PTH2R    |
| CPM      | SUSD1    | ACVR1B    | SIT1      | ADCY7    | GPR160   |
| DLK2     | CNR1     | TCTN2     | LMBR1     | SLC37A2  | ATP6V0A2 |
| L1CAM    | FFAR1    | SPPL2A    | CCR5      | CIP2A    | SLCO4C1  |
| ACHE     | NT5E     | TSPAN18   | SLC38A11  | KCNA3    | MC1R     |
| LRIG2    | ICAM1    | SLC16A6   | SCARA5    | CD274    | UPK3B    |
| OSTM1    | TM9SF3   | CALCRL    | DLL4      | OR52N4   | SLC6A9   |
| AMIGO2   | CDHR2    | ITGA4     | CDH1      | ATP13A3  | SLC12A2  |
| FCRL1    | PTCH1    | SGCA      | IL2RG     | TRABD2A  | TLR2     |
| ICOSLG   | EDA2R    | SIGLEC6   | SLC2A8    | ANKH     | LAMP5    |
| CD84     | F2R      | PRSS21    | DPEP2     | MFAP3    | HLA.DRA  |
| ICAM3    | SMAP2    | ADAM15    | GRIN2D    | SLC22A1  | ADRA1B   |
| EFNA3    | RNF150   | IL2RB     | SLC29A4   | PVR      | TSPAN33  |
| CCR2     | SERINC1  | GRIK3     | ADIPOR2   | ITGAE    | IL7R     |
| P2RY12   | SLC12A4  | TNFSF11   | EFNA1     | LDLR     | SLC26A1  |
| DLL3     | SLC6A16  | BTLA      | ABCB1     | UBAC2    | BOC      |
| KLRK1    | GPR183   | LRP6      | PQLC2     | FGFR1    | ROR2     |
| GPC5     | PTK7     | BEST4     | SLC26A2   | TMEM179B | TGFBR2   |

|          |           |          |           |          |          |
|----------|-----------|----------|-----------|----------|----------|
| BRI3     | IGSF9B    | FNDC9    | ITM2B     | SCARF2   | RELL1    |
| HLA.B    | BST2      | PTPA     | TENM4     | PTTG1IP  | C3orf52  |
| PSEN1    | MRC2      | SUCO     | IFNAR2    | LRP1     | GPR180   |
| FAM174B  | PTPRN2    | SLC39A9  | CD37      | DAG1     | TNFRSF18 |
| MRV1     | CRB2      | SELL     | ITGA10    | MAMDC4   | SLC45A4  |
| IL10RA   | TNFRSF11A | INSR     | C18orf54  | VN1R1    | FCRL2    |
| UGT8     | CD4       | SLC13A4  | ICAM5     | GABBR1   | SPNS2    |
| LYPD6B   | IL17RB    | LNPEP    | PDCD1     | CSF1R    | GPR153   |
| CX3CL1   | SORL1     | EPCAM    | SIGLEC14  | CD83     | ICAM2    |
| CD40     | SLC37A1   | NAALADL1 | EMP3      | IL6ST    | ACP2     |
| ACE      | ABCC10    | SLC46A3  | CD3D      | LHFPL4   | IGSF8    |
| DSCAML1  | PNP       | GPR107   | TMEM106B  | CTNS     | NLGN3    |
| ADAM12   | LINGO3    | LRP1B    | TMEM140   | FCGR3A   | TM9SF1   |
| SLC9A6   | LILRB2    | ITGB3    | SLC36A1   | MICA     | P2RY1    |
| GALR2    | DIRC2     | LILRA5   | TMCO3     | PILRB    | TMEM116  |
| LILRA2   | SLC35A5   | SLC15A3  | GPR157    | AOC3     | ADRB2    |
| SUSD5    | LIG1      | NIPAL2   | PHEX      | DPP4     | CD79A    |
| TNFRSF21 | TNFRSS13  | IFNAR1   | P2RY8     | LRFN3    | GABRA4   |
| MEGF11   | IL12RB2   | IL11RA   | VNN2      | SECTM1   | CD55     |
| CLSTN3   | ABCA5     | CDH13    | MYADM     | GPR155   | ERMAP    |
| DDR1     | PTCHD1    | TMEM63C  | FZD1      | ANPEP    | MR1      |
| TGFBR1   | OR2W3     | SLC31A1  | SLC1A3    | TSPAN3   | CXCR6    |
| LRP5     | CD96      | ANO6     | GDA       | PTPRC    | ROBO3    |
| ALPL     | PTPRS     | NPC1     | TMEM9     | RNF13    | IGSF6    |
| GLIPR1   | SEMA4B    | SEZ6     | GJB6      | SCAP     | MDGA1    |
| GPR35    | ABCA7     | SCARB2   | SLC38A2   | PKD1L1   | ATG9A    |
| NOTCH1   | LMBR1L    | TMPRSS6  | KIAA1324L | SLAMF1   | GPRC5C   |
| LRRTM2   | TMEM245   | HLA.G    | ITFG1     | SIDT2    | SLC47A1  |
| AMIGO1   | TSPAN31   | GPR137C  | NFAM1     | IL17RC   | GIPR     |
| CHL1     | SLC2A13   | SCN3A    | KIT       | MFAP3L   | PTPRJ    |
| SLCO5A1  | GPR137B   | P2RY11   | CA14      | SLC1A4   | S1PR1    |
| LGR4     | RGMB      | SEMA7A   | TMX3      | P2RX7    | RNFT1    |
| PTPRM    | ADCY3     | ULBP2    | LRP10     | BMPR2    | CNTNAP2  |
| EPHB3    | AXL       | PROCR    | HACD4     | NRCAM    | FZD3     |
| C5AR1    | PTPRT     | ADAM28   | CLMP      | IL3RA    | OR2L13   |
| UMODL1   | CD1D      | LRRN2    | HBP1      | RTN4R    | SSTR3    |
| CNR2     | CCR6      | TSPAN14  | SLC36A4   | SLC15A2  | SLC20A2  |
| SLC5A5   | ZFYVE27   | PANX1    | KREMEN2   | LRP12    | SLC39A10 |
| STS      | TAS2R14   | CASD1    | IL1RAP    | DGCR2    | NUP210L  |
| ITGB2    | TMEM161A  | FCGR2C   | SLC11A1   | LYSMD3   | LAMP1    |
| FGFR4    | CACNA1C   | SIRPA    | OPRL1     | HEPHL1   | CD300C   |
| TMEM30A  | TNFRSF1B  | TSPAN4   | PLXNB2    | AGER     | LILRB3   |
| SPPL2B   | C3AR1     | PODXL2   | ROR1      | SIGLEC10 | RYK      |
| PGAP1    | PRNP      | BTN2A2   | CHRNE     | SIRPB1   | TACR1    |
| THBD     | SMO       | IGHEP2   | C1orf159  | AMN      | PKD2     |
| CD101    | FCGRT     | SSTR2    | RXFP4     | CNNM2    | P2RX6    |
| SLAMF6   | GPR37L1   | SLC4A5   | CD302     | MEGF8    | F11R     |
| CLEC7A   | STT3B     | HLA.DOB  | LARGE2    | CD74     | MPZL1    |
| MMP25    | SLC11A2   | SIGLEC5  | RNF43     | TTYH1    | NLGN4Y   |
| APPL2    | CELSR2    | ABCC2    | LY6E      | SLC12A8  | SAT1     |

|          |          |          |          |          |
|----------|----------|----------|----------|----------|
| TLR1     | PSAP     | ANO7     | MPZL2    | PLXNA1   |
| GP6      | MS4A1    | GPR143   | CD300LF  | CDH23    |
| TPBG     | HLA.DPA1 | HHLA2    | CNTNAP3  | F2RL2    |
| NIPAL4   | NPR2     | SLC12A9  | EFNB1    | CLSTN1   |
| CXCL16   | DAGLB    | MAG      | SCN8A    | CATSPERG |
| TMEM106A | PILRA    | ALG2     | SEMA6A   | ABCC5    |
| CLN3     | FLVCR2   | ULBP1    | SLC6A12  | ITGAD    |
| CD180    | CCRL2    | IGSF9    | TMEM204  | LILRB5   |
| HLA.H    | ADAM10   | HLA.DMA  | NRROS    | VIPR1    |
| SLC37A3  | EFNA4    | TLR8     | TAP2     | HLA.DRB5 |
| JAG2     | SEMA4A   | OXER1    | FZD5     | RECK     |
| C1orf56  | LEPR     | ERBB2    | NLGN4X   | GPR22    |
| SLC43A3  | CR2      | NRP2     | CD6      | GPR137   |
| CLDN7    | GABRR2   | TLR4     | FAM171A1 | APC2     |
| TMEM8B   | DISP2    | LY9      | TNFRSF4  | CD1C     |
| SLC5A11  | ITGA1    | TMEM255A | TNFRSF9  | LY75     |
| ABCA2    | SLC41A1  | CD47     | NOTCH2   | LILRA4   |
| FCGR2B   | SLC29A2  | PIK3IP1  | SLC39A4  | SLC16A4  |
| RELT     | FAM189B  | PKD1     | TMEM8A   | TM7SF3   |
| MILR1    | CDH26    | SLC3A1   | TLR7     | LDLRAD4  |
| OR13A1   | NPR1     | SLCO4A1  | MEGF9    | GPR65    |
| ACKR3    | TNFRSF14 | ADRB1    | EPHB6    | IFNGR2   |
| CHRM4    | ATRN     | CD48     | FNDC5    | CNTNAP1  |
| GPR161   | ERVK13.1 | SCARF1   | SLC2A3   | HTR2B    |
| TMEM63B  | SEMA5B   | KCNJ3    | HLA.DMB  | HLA.DRB1 |
| FZD6     | ZACN     | EPHB4    | SCNN1D   | UPK3A    |
| VLDLR    | TMEM94   | MYO1C    | FKRP     | PIGR     |
| NPTN     | SLC44A2  | CLDN12   | ITM2C    | HLA.DQB2 |
| LRRC19   | SLC5A6   | TMEM255B | HLA.DQA1 | KCNMB3   |
| CCR7     | GRIK1    | IGFLR1   | LRFN1    | GPM6B    |
| SORT1    | NCSTN    | BAMBI    | OXTR     | CXCR5    |
| MFSD2B   | SLC22A17 | ITGA6    | SPINT2   | CHPT1    |
| GYPC     | LILRB1   | P2RY6    | ATP1A3   | CLDN15   |
| CSMD1    | VASN     | TMEM178B | ADCY6    | HLA.DQB1 |
| C5orf15  | PTPRA    | SCN2A    | PIGO     | DISP1    |
| SLC12A6  | NIPAL1   | CD38     | LRRC37B  | LMBRD2   |
| SEMA4G   | KLRF1    | LRRC37A3 | MME      | CD244    |
| PTPRO    | SLC41A3  | IL10RB   | IL18RAP  | HLA.DQA2 |
| CXCR4    | FCGR2A   | SLFN5    | PDCD1LG2 | GPM6A    |
| SERINC5  | PRND     | TSPAN9   | GRAMD1B  | OMG      |
| IGF1R    | BTN2A3P  | KCNJ14   | GPBAR1   | SLC2A14  |
| HBEGF    | SYP      | TSPAN15  | SLC12A7  |          |
| CLEC4M   | RNF167   | SPIN1    | DUOX1    |          |
| LRRC37A2 | SLC14A1  | SPNS3    | GRIN2A   |          |
| LAT2     | ADORA2B  | GPC1     | UNC93B1  |          |
| ADAM9    | PMEL     | IL17RA   | TMEM123  |          |
| TP53I13  | CD109    | LRFN4    | LAMP2    |          |
| SIDT1    | PCDH12   | SLC10A1  | P2RY13   |          |
| FLRT1    | HLA.DOA  | SLC22A23 | SELPLG   |          |
| SLC44A5  | NOTCH4   | GPR3     | EFNB2    |          |

**Supplementary Table 2. Information of liver allograft recipients (N=22)**

| Patient ID | Sex | Age | Race             | Diagnosis   | Immunosuppression  | Sample collection year after post-transplant | DSA Status | Rejection Status |
|------------|-----|-----|------------------|-------------|--------------------|----------------------------------------------|------------|------------------|
| 1*         | M   | 48  | White: NS/U      | CCC         | cyclo and mmf      | 2,5                                          | positive   | No               |
| 2          | F   | 55  | White: NS/U      | PBC         | tac, mmf, pred     | 5                                            | negative   | No               |
| 3*         | M   | 58  | White: NS/U      | LC          | rapa monotherapy   | 2,5                                          | positive   | No               |
| 4*         | M   | 45  | White: NS/U      | LCPNCTC     | tac and prednisone | 2,5                                          | positive   | No               |
| 5          | M   | 49  | White: NS/U      | CCB         | tac monotherapy    | 2                                            | positive   | No               |
| 6          | M   | 19  | African American | BAE         | tac, mmf, steroids | 2                                            | negative   | No               |
| 7          | M   | 45  | Mexican          | CC          | tac monotherapy    | 5                                            | negative   | No               |
| 8          | F   | 30  | African American | MD          | tac, mmf and pred  | 2                                            | positive   | Yes              |
| 9          | M   | 55  | White: NS/U      | CC          | tac and pred       | 5                                            | positive   | No               |
| 10         | M   | 45  | White: NS/U      | LCPNCTC     | tac monotherapy    | 2                                            | positive   | No               |
| 11*        | M   | 50  | Mexican          | CCC         | tac and MMF        | 2,5                                          | positive   | No               |
| 12         | F   | 57  | African American | PSC         | tac, mmf, steroids | 2,5                                          | negative   | No               |
| 13*        | M   | 42  | White: NS/U      | Sfhf-Unsp   | tac and pred       | 2,5                                          | negative   | No               |
| 14         | M   | 48  | White: NS/U      | CCC         | cyclo and MMF      | 5                                            | positive   | No               |
| 15*        | M   | 52  | Mexican          | LC          | tac monotherapy    | 2,5                                          | negative   | No               |
| 16*        | M   | 50  | Mexican          | LCPNCTC     | cyclo and rapa     | 2,5                                          | negative   | No               |
| 17*        | M   | 48  | White: NS/U      | CCB         | cyclo and mmf      | 2,5                                          | negative   | No               |
| 18*        | F   | 40  | White: NS/U      | CALB        | tac, rapa, pred    | 2,5                                          | negative   | No               |
| 19         | M   | 50  | White: NS/U      | LCPNCTC     | cyclo monotherapy  | 5                                            | negative   | No               |
| 20         | M   | 61  | White: NS/U      | MD          | rapa and mmf       | 5                                            | positive   | No               |
| 21         | F   | 28  | White: NS/U      | Fhf-Tylenol | tac, rapa, pred    | 2                                            | negative   | Yes              |
| 22         | F   | 42  | White: NS/U      | PBC         | tac, mmf, and pred | 2                                            | negative   | No               |

\* Patient has two time point samples.

Cyclo, Cyclosporin; MMF, Mycophenolate mofetil; TAC, tacrolimus; CAM, Campath; ZEN, Zenapax; CNI, Calcineurin inhibitors (Cyclosporin/Neoral/Tac/Generic Tac/TACX); mTOR, Mechanistic target of rapamycin (Sirolimus/Everolimus); RAPA, Rapamycin; PRED, Prednisone; MPR, Methylprednisolone, HC, Hydrocortisone. CCC, Cirrhosis Chronic C; PBC, Primary Biliary Cirrhosis; LC, Laennec's Cirrhosis; LCPNCTC, Laennec's Cirrhosis & Post Necrotic Cirrhosis Type C; CCB, Cirrhosis Chronic B; BAE, Biliary Atresia: Extrahepatic; CC, Cirrhosis: Cryptogenic; MD, Metabolic Disease: Wilson'S Disease, Other Copper Disorders, PSC, Primary Sclerosing Cholangitis: No Bowel Disease; CALB, Cirrhosis: Autoimmune, Lupoid, Banti S; Fhf, fulminant hepatic failure.

**Supplementary Table 3. Information of renal allograft recipients (N=20)**

| <b>Patient ID</b> | <b>Sex</b> | <b>Age</b> | <b>Race</b>      | <b>Diagnosis (Cause of ESRD)</b>       | <b>Steroids/ Immunosuppression</b> | <b>Sample collection year after post-transplant</b> | <b>DSA Status</b> | <b>Rejection</b> |
|-------------------|------------|------------|------------------|----------------------------------------|------------------------------------|-----------------------------------------------------|-------------------|------------------|
| 1                 | M          | 52         | European Descent | Membranous                             | Prograf, MMF, Pred                 | 1                                                   | Positive          | 0                |
| 2                 | M          | 44         | European Descent | DM-2                                   | Prograf, MMF                       | 1                                                   | Negative          | 0                |
| 3                 | M          | 43         | European Descent | ADPKD                                  | Prograf, MMF                       | 1                                                   | Negative          | 0                |
| 4                 | F          | 47         | European Descent | MPGN                                   | Prograf, MMF, Pred                 | 1                                                   | Positive          | 0                |
| 5                 | M          | 60         | European Descent | membranous                             | Prograf, MMF, Pred                 | 1                                                   | Negative          | 0                |
| 6                 | F          | 25         | European Descent | immune complex proliferative GN        | Prograf, MMF, Pred                 | 1                                                   | Negative          | 0                |
| 7                 | F          | 42         | European Descent | unknown                                | Prograf, MMF, Pred                 | 1                                                   | Negative          | 0                |
| 8                 | F          | 57         | European Descent | MPGN type 1 and DM-2                   | Prograf, MMF                       | 1                                                   | Negative          | 0                |
| 9                 | M          | 27         | European Descent | IgA                                    | Prograf, MMF                       | 1                                                   | Negative          | 0                |
| 10                | M          | 43         | European Descent | ADPKD                                  | Prograf, MMF                       | 1                                                   | Negative          | 0                |
| 11                | F          | 27         | European Descent | DM-1                                   | Prograf, MMF, Pred                 | 1                                                   | Positive          | 0                |
| 12                | M          | 44         | European Descent | ADPKD                                  | Prograf, MMF, Pred                 | 1                                                   | Negative          | 0                |
| 13                | M          | 68         | African American | MPGN                                   | Prograf, MMF, Pred                 | 1                                                   | Negative          | 0                |
| 14                | M          | 67         | European Descent | MPGN type 1 and DM-2                   | Prograf, MMF, Pred                 | 1                                                   | Negative          | 0                |
| 15                | M          | 44         | European Descent | DM-1                                   | Prograf, MMF, Pred                 | 1                                                   | Negative          | 0                |
| 16                | M          | 56         | White: NS/U      | DM-2                                   | Prograf, MMF                       | 1                                                   | Positive          | 0                |
| 17                | M          | 62         | European Descent | NSAID, AKI in setting of prostatectomy | Prograf, MMF                       | 1                                                   | Positive          | 0                |
| 18                | M          | 40         | European Descent | FSGS                                   | Prograf, MMF                       | 1                                                   | Negative          | 0                |
| 19                | M          | 63         | European Descent | DM-2                                   | Prograf, MMF                       | 1                                                   | Negative          | 0                |
| 20                | F          | 59         | European Descent | ADPKD                                  | Prograf, MMF                       | 1                                                   | Negative          | 0                |

Following abbreviations are used: ESRD, end stage of renal diseases; ADPKD, autosomal dominant polycystic kidney disease, MPGN, membranoproliferative glomerulonephritis; DM-1, diabetes mellitus type-1; DM-2, IgA, immunoglobulin A; AKI, acute kidney injury; diabetes mellitus type-2; NSAID, nonsteroidal anti-inflammatory drug; GN, glomerulonephritis; FSGS, focal segmental glomerulosclerosis; Prograf, tacrolimus; prednisone; MMF, mycophenolate mofeti; NS/U, not specified/unknown; Campath, Alemtuzumab.
